# Supplementary material
Source: PubMed Central journal article supplement (PMC6555667)
Supplement: NIHMS1527655-supplement-01.pdf [file NIHMS1527655-supplement-01.pdf]

## Supplementary Figure-1

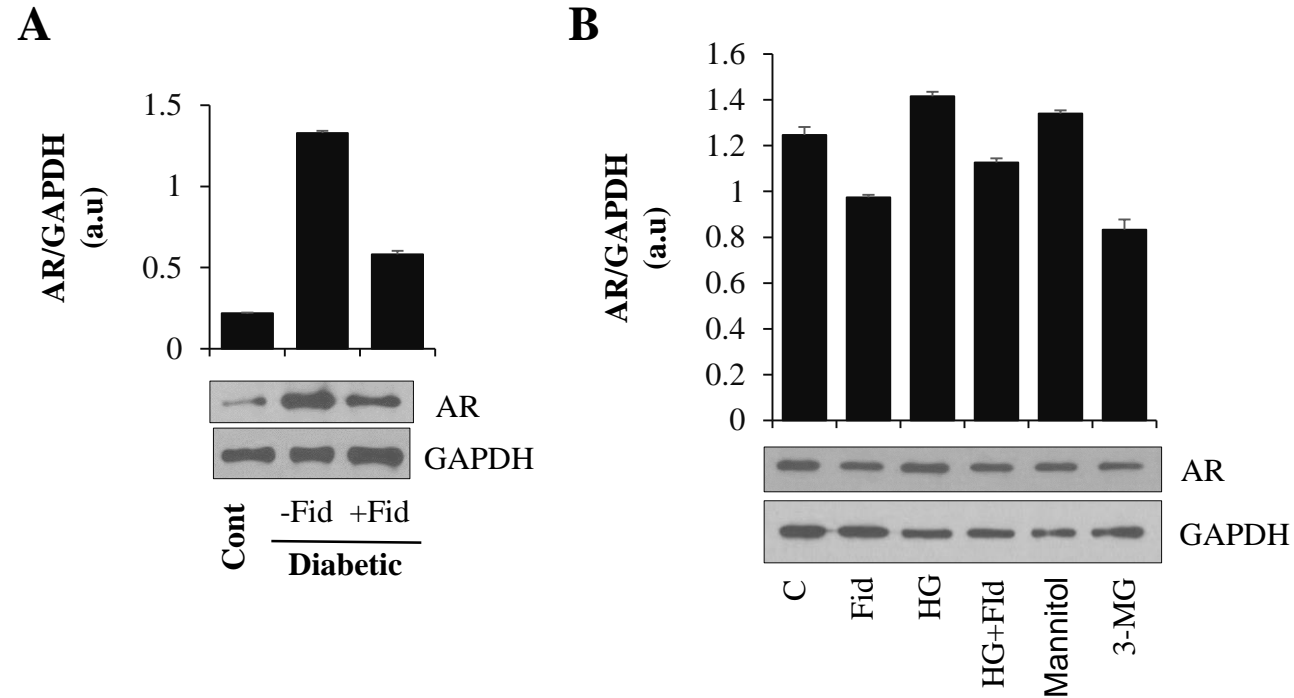

**Supplementary figure:** (A) Representative western blot showing expression of Aldose Reductase (AR) in STZ-induced diabetic mice treated without or with fidarestat (10mg/kg/day i.p) for 21 days. (B) Western blot showing expression of Aldose Reductase (AR) in HUVECs treated with HG (25mM) either alone or in combination with Fidarestat (10 $\mu$ M) along-with osmotic control Mannitol (25mM) and non-metabolizable glucose analogue 3-Methylglucose (3-MG) (25mM) in 0.5% FBS containing media for 24h. Bars represent Mean $\pm$  SD. Representative data is shown.
